# Supplementary material
Source: PubMed Central journal article supplement (PMC5586158)
Supplement: Supp_Figure2.pdf [file Supp_Figure2.pdf]

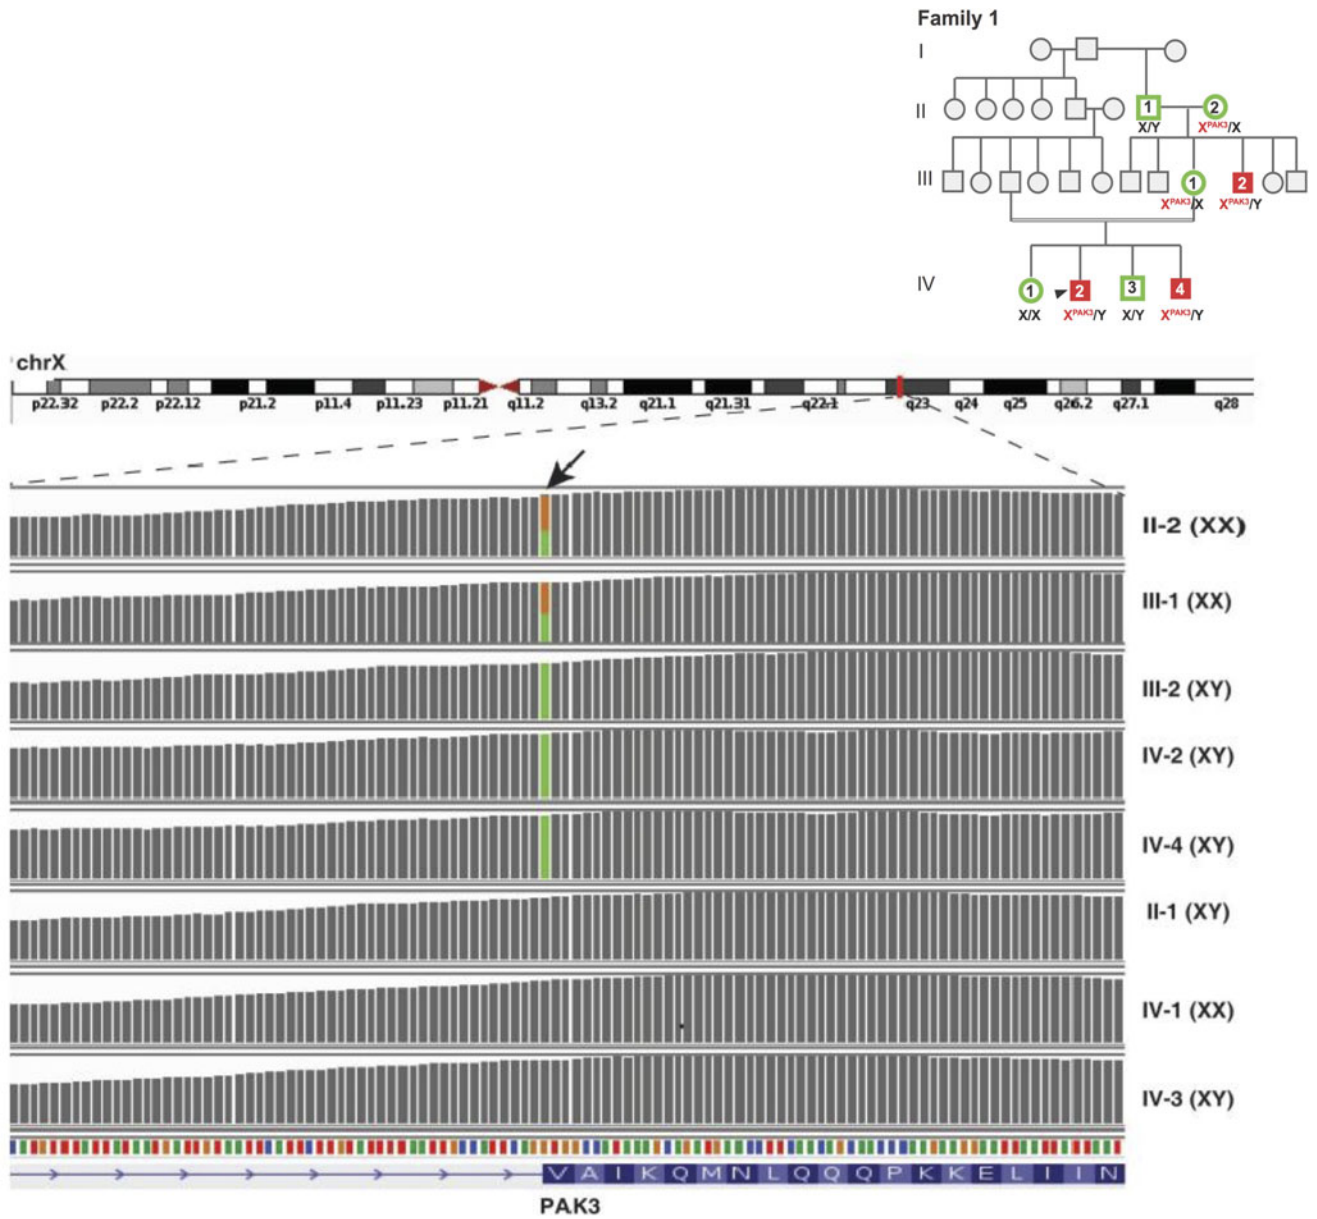

**SUPPLEMENTARY FIG. S2.** IGV visualization of V294M mutation in *PAK3* gene. IGV, integrative genomics viewer.
