# Supplementary material
Source: PubMed Central journal article supplement (PMC5586158)
Supplement: Supp_Figure3.pdf [file Supp_Figure3.pdf]

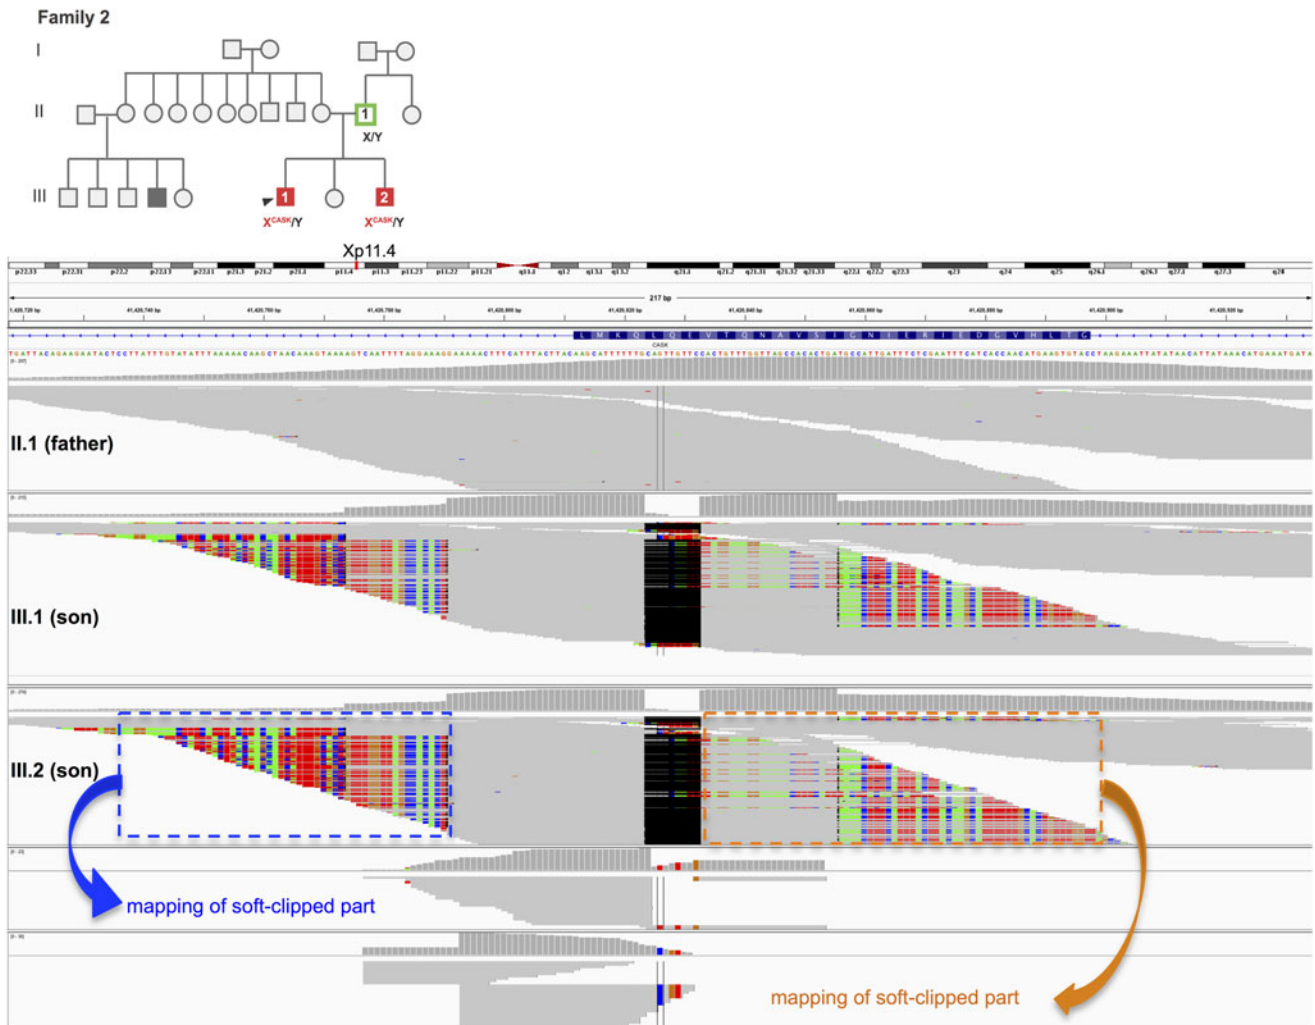

**SUPPLEMENTARY FIG. S3.** (A) IGV plots show read mapping of three individuals in family 2. Mapping of soft-clipped bases (shown in four colors *red* (T), *green* (A), *blue* (G), and *orange* (C) onto the reference genome hg19 at two *bottom panels* illustrates the evidence of short duplication. (B) Sanger sequencing chromatograms from three individuals in family 2 in the region containing a complex genomic alteration that resulted in two additional copies of a 34 bp sequence that spans exon–intron junction of *CASK* in the affected family members are shown. Both forward and reverse reads are shown for all the individuals.
