# Supplementary material
Source: PubMed Central journal article supplement (PMC5586158)
Supplement: Supp_Figure5.pdf [file Supp_Figure5.pdf]

## Methyl-CpG binding protein 2 (MECP2)

|                     |                                                                                                            |
|---------------------|------------------------------------------------------------------------------------------------------------|
| Homo_sapiens        | KESSIRSVQETVLP I K K R K T R E T V S I E V K E V V K P L L V S T L G E K S G K G L K T C K S P G R K S K E |
| Pan_troglodytes     | KESSIRSVQETVLP I K K R K T R E T V S I E V K E V V K P L L V S T L G E K S G K G L K T C K S P G R K S K E |
| Macaca_fascicularis | KESSIRSVQETVLP I K K R K T R E T V S I E V K E V V K P L L V S T L G E K S G K G L K T C K S P G R K S K E |
| Equus_caballus      | KESSIRSVQETVLP I K K R K T R E T V S I E V K E V V K P L L V S T L G E K S G K G L K T C K S P G R K S K E |
| Canis_familiaris    | KESSIRSVQETVLP I K K R K T R E T V S I E V K E V V K P L L V S T L G E K S G K G L K T C K S P G R K S K E |
| Bos_taurus          | KESSIRSVQETVLP I K K R K T R E T V S I E V K E V V K P L L V S T L G E K S G K G L K T C K S P G R K S K E |
| Felis_catus         | KESSIRSVQETVLP I K K R K T R E T V S I E V K E V V K P L L V S T L G E K S G K G L K T C K S P G R K S K E |
| Oryctolagus         | KESSIRSVQETVLP I K K R K T R E T V S I E V K E V V K P L L V S T L G E K S G K G L K T C K S P G R K S K E |
| Mus_musculus        | KESSIRSVHETVLP I K K R K T R E T V S I E V K E V V K P L L V S T L G E K S G K G L K T C K S P G R K S K E |
| Rattus_norvigicus   | KESSIRSVQETVLP I K K R K T R E T V S I E V K E V V K P L L V S T L G E K S G K G L K T C K S P G R K S K E |

\*\*\*\*\*:\*\*\*\*\*

 p.P354T

**SUPPLEMENTARY FIG. S5.** Depiction of conservation of mutated residue and the neighboring regions in orthologous species for MECP2.
