# Supplementary material
Source: PubMed Central journal article supplement (PMC5586158)
Supplement: Supp_Table1.pdf [file Supp_Table1.pdf]

## Supplementary Data

SUPPLEMENTARY TABLE S1. PHENOTYPE DETAILS OF AFFECTED INDIVIDUALS FROM FAMILY 1

| <i>Phenotype</i>                | <i>Family1.IV.2<br/>(Proband)</i> | <i>Family1.IV.4<br/>(Brother)</i> | <i>Family1.III.2<br/>(Maternal uncle)</i> |
|---------------------------------|-----------------------------------|-----------------------------------|-------------------------------------------|
| Age (years)                     | 7                                 | 3                                 | 25                                        |
| ID                              | Moderate                          | Moderate                          | Moderate                                  |
| IQ                              | 35                                | 44                                | Not done                                  |
| Independent walking             | Delayed (2 years)                 | Delayed (2 years)                 | Data not available                        |
| First words                     | Delayed (6 years)                 | Delayed (3 years)                 | Delayed (9 years)                         |
| Seizure                         | Single, febrile                   | Single, febrile                   | None                                      |
| Head circumference              | 44 cm; -6 SD                      | 45 cm; -4 SD                      | 54 cm; -1.5 SD                            |
| Microcephaly                    | Yes                               | Yes                               | Borderline                                |
| Stature                         | Short (96 cm)                     | Average (90 cm)                   | Average/tall                              |
| Obesity                         | No                                | Yes                               | No                                        |
| Penis                           | Ordinary                          | Micropenis                        | Ordinary                                  |
| Testes                          | Ordinary                          | Hypoplastic                       | Ordinary                                  |
| Face                            | Elongated                         | Elongated                         | Low                                       |
| Anterior hairline               | Ordinary                          | Low                               | Low                                       |
| Ear position                    | Low set                           | Low set                           | Low set                                   |
| Eyebrows                        | Bushy                             | Bushy                             | Bushy                                     |
| Synophrys                       | Yes                               | Yes                               | Yes                                       |
| Philtrum                        | Short                             | Ordinary                          | Short                                     |
| Palate                          | High arched                       | Ordinary                          | Ordinary                                  |
| Teeth                           | Normal                            | Spaced                            | Spaced                                    |
| Long and/or prominent ears      | Yes                               | Yes                               | Yes                                       |
| Broad ear lobule                | Yes                               | Yes                               | Yes                                       |
| Neck                            | Short                             | Short                             | Short                                     |
| Chest                           | Ordinary                          | Ordinary                          | Mild pectus excavatum                     |
| Simian crease                   | No                                | Unilateral (left)                 | No                                        |
| Pes planus (flat feet)          | Yes                               | Yes                               | Yes                                       |
| Pigmentary skin change/dry skin | No                                | No                                | Yes                                       |
| Posture                         | Normal                            | Normal                            | Stooping                                  |
| Behavior                        | ADHD                              | ADHD                              | Aggression                                |

ADHD, attention-deficit hyperactivity disorder.
