# Supplementary material
Source: PubMed Central journal article supplement (PMC5586158)
Supplement: Supp_Table2.pdf [file Supp_Table2.pdf]

SUPPLEMENTARY TABLE S2. PHENOTYPE DETAILS OF AFFECTED INDIVIDUALS FROM FAMILY 2

| <i>Phenotype</i>            | <i>Family2.III.1 (Proband)</i> | <i>Family2.III.2 (Brother)</i> |
|-----------------------------|--------------------------------|--------------------------------|
| Age                         | 14                             | 7                              |
| ID                          | Moderate                       | Moderate                       |
| Independent walking (years) | 5                              | 5                              |
| First words (years)         | 6                              | 5                              |
| Speaking in sentences       | Not attained                   | Not attained                   |
| Seizure                     | No                             | Myoclonic seizures             |
| Head circumference          | 49 cm (3.7 SD below mean)      | 47.5 cm (3.6 SD below mean)    |
| Microcephaly                | Yes                            | Yes                            |
| Height                      | 150 cm (2 SD below mean)       | 104 cm (3 SD below mean)       |
| Anterior Hairline           | Low                            | Low                            |
| Anterior cow-lick           | Present                        | Absent                         |
| Eye brows                   | Straight                       | Straight                       |
| Synophrys                   | No                             | Yes                            |
| Nostril                     | Normal                         | Flaring                        |
| Mouth                       | Open/closed                    | Open                           |
| Ear position                | Low set and posterior          | Low set and posterior          |
| Clinodactyly                | Yes                            | Yes                            |
| Simian crease               | No                             | Yes                            |
| Joints                      | —                              | Hyperextensible                |
| Limbs                       | Long                           | —                              |
| Skin                        | Dry                            | Dry                            |
| Deep tendon reflexes        | Brisk                          | Brisk                          |
| Gait                        | Normal                         | Normal                         |
| Co-ordination               | Normal (no ataxia)             | Normal (no ataxia)             |
| Behavior                    | ADHD                           | ADHD (self injurious behavior) |
