# Supplementary material
Source: PubMed Central journal article supplement (PMC5586158)
Supplement: Supp_Table3.pdf [file Supp_Table3.pdf]

SUPPLEMENTARY TABLE S3. PHENOTYPE DETAILS OF AFFECTED INDIVIDUALS FROM FAMILY 3

| <i>Phenotype</i>             | <i>Family3.III.1<br/>(Proband)</i>             | <i>Family3.III.2<br/>(twin brother)</i>        |
|------------------------------|------------------------------------------------|------------------------------------------------|
| Age (years)                  | 9                                              | 9                                              |
| ID                           | Moderate                                       | Borderline                                     |
| IQ                           | 42                                             | 72                                             |
| Independent walking (months) | 15                                             | 13                                             |
| First words (years)          | 5                                              | 2                                              |
| Talk in sentences            | Not attained                                   | 3 years                                        |
| Head circumference (cm)      | 52                                             | 51                                             |
| Height (cm)                  | 142                                            | 138                                            |
| Anterior hairline            | Low                                            | Typical                                        |
| Synophrys                    | Yes                                            | Yes                                            |
| High arched palate           | Yes                                            | Yes                                            |
| Long/prominent ears          | Yes                                            | Yes                                            |
| Hearing                      | Bilateral sensory-neural<br>hearing impairment | Bilateral sensory-neural<br>hearing impairment |
| Neck                         | Broad                                          | Broad                                          |
| Gynecomastia                 | Mild                                           | Mild                                           |
| Enlarged nipples             | Yes                                            | Yes                                            |
| Abdomen                      | Distended                                      | Distended                                      |
| Knees                        | Mild knock knees                               | Mild knock knees                               |
| Behavior                     | Autism spectrum disorder<br>with ADHD          | No abnormality                                 |
