# Supplementary material
Source: PubMed Central journal article supplement (PMC5586158)
Supplement: Supp_Table4.pdf [file Supp_Table4.pdf]

SUPPLEMENTARY TABLE S4. GENOME COVERAGE SUMMARY OF SEQUENCING DATA

| <i>Sample name</i> | <i>Before combining sequencing data</i> |                         |                          |                         | <i>After combining sequencing data</i> |                         |                                                  |                         |
|--------------------|-----------------------------------------|-------------------------|--------------------------|-------------------------|----------------------------------------|-------------------------|--------------------------------------------------|-------------------------|
|                    | <i>Whole exome</i>                      |                         | <i>X-panel</i>           |                         | <i>Whole exome + X-Panel</i>           |                         | <i>Whole exome + X-panel (X-chromosome only)</i> |                         |
|                    | <i>Mean coverage (x)</i>                | <i>%Bases above 20x</i> | <i>Mean coverage (x)</i> | <i>%Bases above 20x</i> | <i>Mean coverage (x)</i>               | <i>%Bases above 20x</i> | <i>Mean coverage (x)</i>                         | <i>%Bases above 20x</i> |
| Family1 II.1       | 55.23                                   | 88                      | 350.7                    | 99                      | 73.7                                   | 89.8                    | 370.11                                           | 99.2                    |
| Family1 II.2       | 59.74                                   | 90.3                    | 367.32                   | 99                      | 78.66                                  | 91                      | 407.87                                           | 99.4                    |
| Family1 III.1      | 55.89                                   | 89                      | 448.43                   | 99.3                    | 79.32                                  | 89.8                    | 485.46                                           | 99.5                    |
| Family1 III.2      | 50.67                                   | 86.4                    | 323.64                   | 98.9                    | 67.86                                  | 88.5                    | 341.4                                            | 99.2                    |
| Family1 IV.1       | 61.1                                    | 90.9                    | 468.79                   | 99.3                    | 85.68                                  | 91.7                    | 510.16                                           | 99.5                    |
| Family1 IV.3       | 52.17                                   | 87.4                    | 374.7                    | 99.1                    | 71.98                                  | 89.3                    | 392.92                                           | 99.3                    |
| Family1 IV.2       | 51.81                                   | 87.1                    | 286.34                   | 98.9                    | 66.87                                  | 89.1                    | 304.47                                           | 99.2                    |
| Family1 IV.4       | 55.33                                   | 88.6                    | 361.65                   | 99.1                    | 74.48                                  | 90.3                    | 380.98                                           | 99.3                    |
| Family2 III.1      | 53.66                                   | 86.8                    | 199.01                   | 97.8                    | 63.55                                  | 88.4                    | 216.98                                           | 98.7                    |
| Family2 III.2      | 50.72                                   | 85.2                    | 205.9                    | 97.5                    | 61.02                                  | 87                      | 222.92                                           | 98.5                    |
| Family2 II.1       | 62.26                                   | 89                      | 256.39                   | 98                      | 74.93                                  | 90.3                    | 276.78                                           | 98.7                    |
| Family3 II.1       | 40.57                                   | 78                      | 260.49                   | 98.3                    | 54.07                                  | 80.6                    | 274.11                                           | 98.8                    |
| Family3 II.2       | 56.1                                    | 88.4                    | 340.77                   | 98.6                    | 73.35                                  | 89.1                    | 376.48                                           | 99.3                    |
| Family3 III.1      | 42.68                                   | 79.7                    | 240.05                   | 98.1                    | 54.97                                  | 82                      | 254.48                                           | 98.7                    |
| Family3 III.2      | 45.63                                   | 82                      | 319.53                   | 98.8                    | 62.77                                  | 84.6                    | 335.38                                           | 99                      |
