# Supplementary material
Source: PubMed Central journal article supplement (PMC5586158)

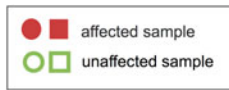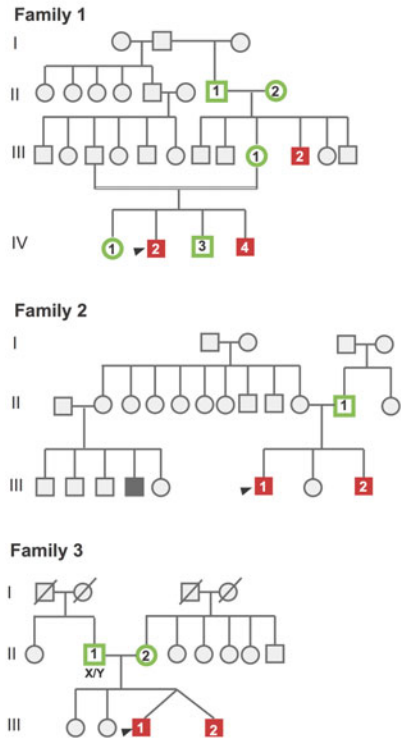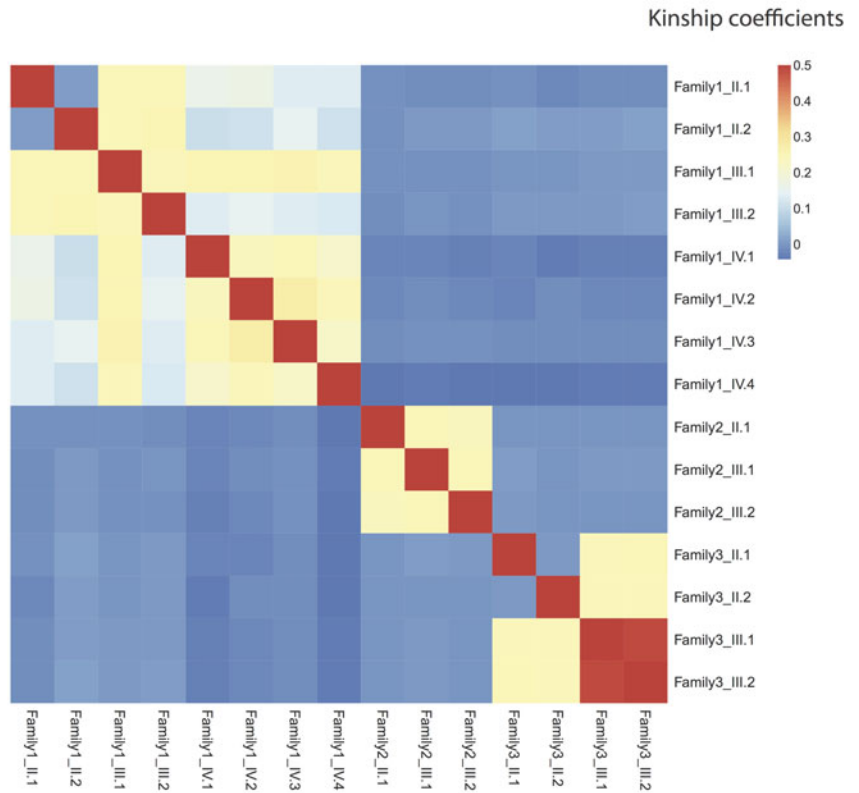

**SUPPLEMENTARY FIG. S1.** Pair-wise kinship coefficients of the 15 samples used in the study.

Supplement: Supp_Figure1.pdf [file Supp_Figure1.pdf]

Family 3

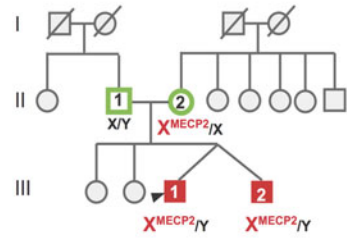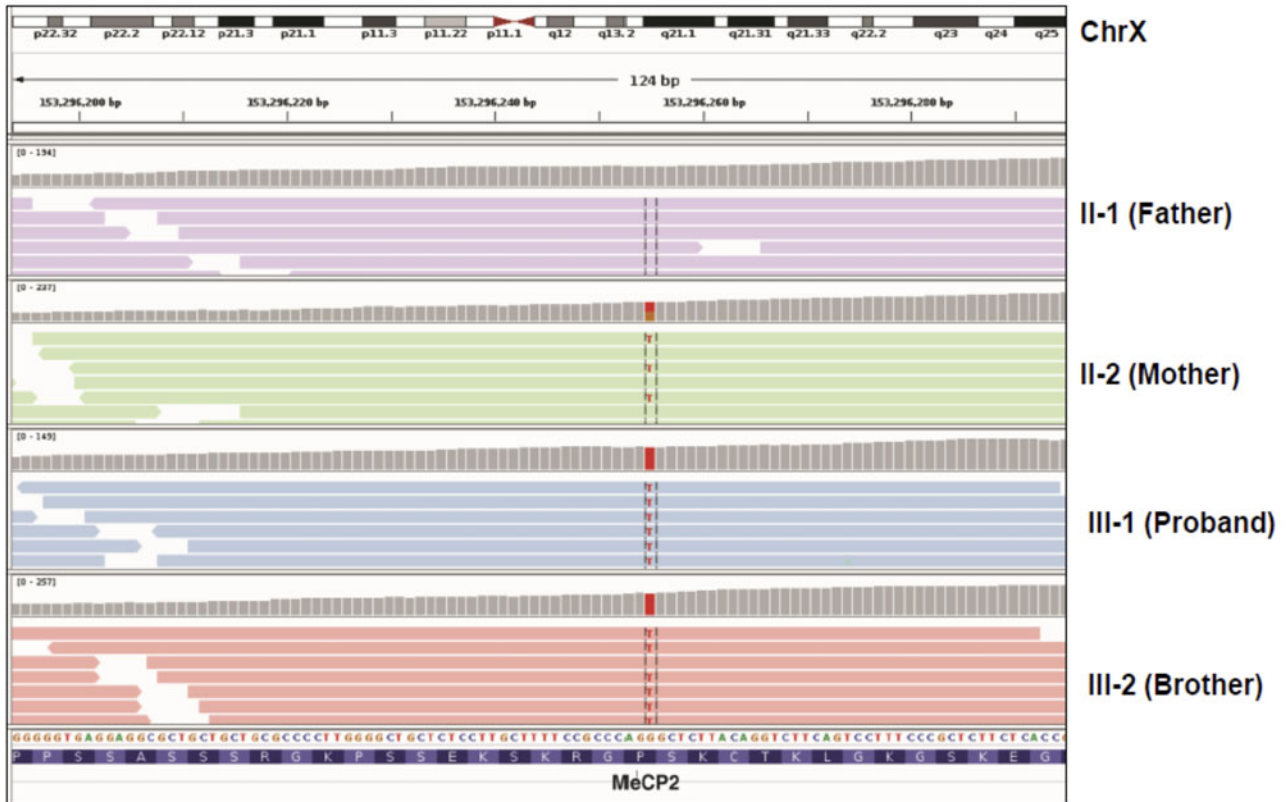

SUPPLEMENTARY FIG. S4. IGV visualization of P354T variant in *MECP2* gene.

Supplement: Supp_Figure4.pdf [file Supp_Figure4.pdf]
